# Supplementary material for: Regulation of Hfq mRNA and Protein Levels in Escherichia coli and Pseudomonas aeruginosa by the Burkholderia cenocepacia MtvR sRNA
Source: PubMed Central journal article supplement (PMC4046987; doi:10.1371/journal.pone.0098813), 2014-06-05
Supplement: pone.0098813.s001.pdf [file pone.0098813.s001.pdf]

## **Supplementary information**

### **Regulation of Hfq mRNA and protein levels in *Escherichia coli* and *Pseudomonas aeruginosa* by the *Burkholderia cenocepacia* MtvR sRNA**

Christian G. Ramos, André M. Grilo, Sílvia A. Sousa, Joana R. Feliciano, Paulo J. P. da Costa and Jorge H. Leitão\*

Department of Bioengineering and Institute for Biotechnology and Bioengineering, Instituto Superior Técnico, Universidade de Lisboa, Av. Rovisco Pais, Torre Sul, Piso 6, 1049-001, Lisboa, Portugal.

\*Corresponding author: Fax: +351 218419199; E-mail: [jorgeleitao@tecnico.ulisboa.pt](mailto:jorgeleitao@tecnico.ulisboa.pt)

## Supplementary Methods

### **Bioinformatic analysis**

BLAST searches were performed using the Integrated Microbial Genomes (IMG) webservice [1], using an E-value  $\leq 1e^{-50}$  as cut-off. MtvR putative targets were predicted using the sRNATarget [2], the TargetRNA [3], and the RNAPredator [4] programs, with a cut-off of 1, a minimum seed of 7 nucleotides, an hybridization target region window size of -100 to + 30 around the translation start site.

## Supplementary Results

### Interaction of MtvR with additional *E. coli* sequences

A Blast search within the genome of *Escherichia coli* strain K-12 sub-strain MG1655, using a low complexity match and a word size of 6 revealed 9 intergenic regions with segments with homology to the *mtvR* sequence. The non-coding region between *lysV* and REPv173 contains the Intergenic Repeat Region (IRR) rtV, and within this region, the sequence 5'-cgcggcgacggcc-3', corresponding to nt 68 to 80 of MtvR. The rlQ, also a IRR found in the non-coding region between *lysQ* and *nadaA*, contains exactly the same sequence of MtvR found on rtV. A H-NS binding sequence of *E. coli* was also found in the non-coding region between *yciG* and *trpA*, sharing homology with nt 53-64 (5'-aatgccgccagc-3') of MtvR. The remaining 6 sequences had no identifiable features worth mentioning (Table S4).

This 13 nucleotide sequence match found within non-coding regions of the *E. coli* genome, together with its conservation along other enteric might represent an unidentified regulatory region in *E. coli*.

### Additional sequences in *P. aeruginosa* PA14 genome with possible interaction with MtvR

Blast analysis using the MtvR encoding sequence to query the genome sequence of *P. aeruginosa* UCBPP-PA14, revealed a 100% match in a 17 nt (5'-GCCGCGCGTGCTGG-3') segment within an intergenic region 232 bp at the 5' side of a probable C4-dicarboxylate transporter and 550 bp at the 3' side of a arginine/ornithine antiporter. A thorough search revealed that this sequence is widely distributed along all organisms, including prokaryotes, eukaryotes and virus. Another search, using the

complete intergenic region, revealed a 38 nt region (5'-AAATGAAGAAGCCCGGCGAACGCCGGGCTTCTTCATTT-3') that is present only in prokaryotes, and in general, with a conservation over 80 %, found in intergenic regions. No conserved regulatory elements could be identified in this sequence. This sequence might represent a new uncharacterized regulatory region.

**Table S1:** Putative MtvR targets in the genome of *E. coli* predicted by TargetRNA

|                      |                    |                                                                                                   |     |                |
|----------------------|--------------------|---------------------------------------------------------------------------------------------------|-----|----------------|
| <b>1</b>             | <b><u>hofN</u></b> | protein required for the utilization of DNA as a carbon source; fimbrial assembly protein homolog |     |                |
|                      | Energy: -17.32     |                                                                                                   |     | p-value: 0.000 |
| sRNA                 | 22                 | CUUAC-UGGGCGGC                                                                                    |     | 10             |
|                      |                    | :                                                                                                 |     |                |
| mRNA ( <i>hofN</i> ) | -2                 | UGAUGAACCCGCCA                                                                                    |     | 12             |
| <hr/>                |                    |                                                                                                   |     |                |
| <b>2</b>             | <b><u>malS</u></b> | alpha-amylase                                                                                     |     |                |
|                      | Energy: -16.82     |                                                                                                   |     | p-value: 0.000 |
| sRNA                 | 18                 | CUGGGCGGCGG-CAGU                                                                                  | 4   |                |
|                      |                    | :          :                                                                                      |     |                |
| mRNA ( <i>malS</i> ) | 5                  | AACUCGCCGCCUGUUU                                                                                  | 20  |                |
| <hr/>                |                    |                                                                                                   |     |                |
| <b>3</b>             | <b><u>gidJ</u></b> | predicted sulfatase/phosphatase                                                                   |     |                |
|                      | Energy: -16.75     |                                                                                                   |     | p-value: 0.000 |
| sRNA                 | 128                | CGCGGGGUUAAUAAGGA                                                                                 | 112 |                |
|                      |                    |                                                                                                   |     |                |
| mRNA ( <i>gidJ</i> ) | 6                  | ACGCCCAAUU-UU-CU                                                                                  | 20  |                |
| <hr/>                |                    |                                                                                                   |     |                |
| <b>4</b>             | <b><u>yjbG</u></b> | conserved protein                                                                                 |     |                |
|                      | Energy: -15.58     |                                                                                                   |     | p-value: 0.000 |
| sRNA                 | 62                 | ACCGCCGUA                                                                                         | 54  |                |
|                      |                    |                                                                                                   |     |                |
| mRNA ( <i>yjbG</i> ) | -13                | AGGCGGCAA                                                                                         | -5  |                |
| <hr/>                |                    |                                                                                                   |     |                |
| <b>5</b>             | <b><u>nagC</u></b> | DNA-binding transcriptional dual regulator, repressor of N-acetylglucosamine                      |     |                |
|                      | Energy: -14.61     |                                                                                                   |     | p-value: 0.001 |
| sRNA                 | 40                 | GCUGU-GUCCGCC                                                                                     |     | 28             |
|                      |                    | :                                                                                                 |     |                |
| mRNA ( <i>nagC</i> ) | 2                  | UGACACCAGGCGGA                                                                                    |     | 15             |
| <hr/>                |                    |                                                                                                   |     |                |
| <b>6</b>             | <b><u>yfiQ</u></b> | CP4-57 prophage; predicted protein                                                                |     |                |
|                      | Energy: -13.77     |                                                                                                   |     | p-value: 0.002 |
| sRNA                 | 21                 | UUACUGGGCGGC                                                                                      | 10  |                |
|                      |                    | :                                                                                                 |     |                |
| mRNA ( <i>yfiQ</i> ) | -1                 | UAUGACCCGUCU                                                                                      | 11  |                |
| <hr/>                |                    |                                                                                                   |     |                |

|                      |                       |                                                                                    |                       |
|----------------------|-----------------------|------------------------------------------------------------------------------------|-----------------------|
| <b>7</b>             | <b><u>uhpA</u></b>    | <b>DNA-binding response regulator in two-component regulatory system with UhpB</b> |                       |
|                      | <b>Energy: -13.01</b> |                                                                                    | <b>p-value: 0.004</b> |
| sRNA                 | 18                    | CUGGGCGGC                                                                          | 10                    |
|                      |                       |                                                                                    |                       |
| mRNA ( <i>uhpA</i> ) | -19                   | UACCCGCCA                                                                          | -11                   |
| <hr/>                |                       |                                                                                    |                       |
| <b>8</b>             | <b><u>yceG</u></b>    | <b>predicted aminodeoxychorismate lyase</b>                                        |                       |
|                      | <b>Energy: -12.99</b> |                                                                                    | <b>p-value: 0.004</b> |
| sRNA                 | 130                   | AUCGCGGGGUAAUA                                                                     | 116                   |
|                      |                       |                                                                                    |                       |
| mRNA ( <i>yceG</i> ) | -17                   | GAGCGCCCGAAUUAG                                                                    | -3                    |
| <hr/>                |                       |                                                                                    |                       |
| <b>9</b>             | <b><u>dacD</u></b>    | <b>D-alanyl-D-alanine carboxypeptidase (penicillin-binding protein 6b)</b>         |                       |
|                      | <b>Energy: -12.91</b> |                                                                                    | <b>p-value: 0.004</b> |
| sRNA                 | 20                    | UACUGGGCGGCGGC                                                                     | 7                     |
|                      |                       | :                                                                                  |                       |
| mRNA ( <i>dacD</i> ) | 1                     | UUGAAACGCCGUCU                                                                     | 14                    |
| <hr/>                |                       |                                                                                    |                       |
| <b>10</b>            | <b><u>csiD</u></b>    | <b>carbon starvation induced gene</b>                                              |                       |
|                      | <b>Energy: -12.72</b> |                                                                                    | <b>p-value: 0.005</b> |
| sRNA                 | 20                    | UAC-UGGGC-GGCGGCAG                                                                 | 5                     |
|                      |                       | :                                                                                  |                       |
| mRNA ( <i>csiD</i> ) | 4                     | AUGCA-CUGACCGCCGU-                                                                 | 20                    |
| <hr/>                |                       |                                                                                    |                       |
| <b>11</b>            | <b><u>mpaA</u></b>    | <b>murein peptide amidase A</b>                                                    |                       |
|                      | <b>Energy: -12.7</b>  |                                                                                    | <b>p-value: 0.005</b> |
| sRNA                 | 21                    | UACUGG-G--CGGCGGC                                                                  | 7                     |
|                      |                       | :                                                                                  |                       |
| mRNA ( <i>mpaA</i> ) | 1                     | AUGACCGUAACCCGCC                                                                   | 17                    |
| <hr/>                |                       |                                                                                    |                       |



**Table S3:** Putative MtvR targets in the genome of *E. coli* predicted by sRNATarget

|   |                              |                                                  |
|---|------------------------------|--------------------------------------------------|
| 1 | <i>nfuA_b3414</i>            | predicted gluconate transport associated protein |
|   | Probability = 1              |                                                  |
|   | sRNA (sRNA1)                 | 11 ggCGGGUCAUucuaU 25<br>.   .                   |
|   | Target ( <i>nfuA_b3414</i> ) | 10 auGCCUAGUAucau -5                             |
| 2 | <i>amiA_b2435</i>            | N-acetylmuramoyl-l-alanine amidase I             |
|   | Probability = 1              |                                                  |
|   | sRNA (sRNA1)                 | 74 gACGGCCUGu 83<br>                             |
|   | Target ( <i>amiA_b2435</i> ) | 1 aUGCCGGACu -9                                  |
| 3 | <i>gpmM_b3612</i>            | phosphoglycero mutase III, cofactor-independent  |
|   | Probability = 1              |                                                  |
|   | sRNA (sRNA1)                 | 68 cGCGGCGACg 77<br>   . .                       |
|   | Target ( <i>gpmM_b3612</i> ) | -1 aCGCUGUUGg -10                                |
|   | Probability = 1              |                                                  |
|   | sRNA (sRNA1)                 | 71 gGCGACGGCCUg 82<br>     .                     |
|   | Target ( <i>gpmM_b3612</i> ) | -1 aCGCUGUUGGAg -12                              |
| 4 | <i>pmrD_b2259</i>            | polymyxin resistance protein B                   |
|   | Probability = 1              |                                                  |
|   | sRNA (sRNA1)                 | 90 cGCAUCGCAa 99<br>                             |
|   | Target ( <i>pmrD_b2259</i> ) | 72 uCGUAGCGUc 63                                 |
|   | Probability = 1              |                                                  |
|   | sRNA (sRNA1)                 | 10 cggcgGUCAUUCUAUc 26<br> . . .     .           |
|   | Target ( <i>pmrD_b2259</i> ) | 16 acugguCGGUAAGGUAa -1                          |
|   | Probability = 1              |                                                  |
|   | sRNA (sRNA1)                 | 55 uGCCGCCAGCA-cgcg 69<br>                       |
|   | Target ( <i>pmrD_b2259</i> ) | 79 gCGGCGGUCGUagcgu 64                           |

---

|          |                              |                                                                                    |
|----------|------------------------------|------------------------------------------------------------------------------------|
| <b>5</b> | <b><i>uhpA_b3669</i></b>     | <b>DNA-binding response regulator in two-component regulatory system with UhpB</b> |
|          | Probability = 1              |                                                                                    |
|          | sRNA (sRNA1)                 | 70 cGGCGACGGc 79<br>   .                                                           |
|          | Target ( <i>uhpA_b3669</i> ) | 16 cCCGUUGCCa 7                                                                    |
|          | Probability = 1              |                                                                                    |
|          | sRNA (sRNA1)                 | 3 uugacGGCGGCGG--gucau--ucuaucacccg 31<br> .      .     .                          |
|          | Target ( <i>uhpA_b3669</i> ) | 20 uauucCCGUUGCCacuaguaccagaaca--gga -11                                           |

---

|          |                              |                                                |
|----------|------------------------------|------------------------------------------------|
| <b>6</b> | <b><i>yfcP_b2333</i></b>     | <b>predicted fimbrial-like adhesin protein</b> |
|          | Probability = 1              |                                                |
|          | sRNA (sRNA1)                 | 28 cCCGCCUGUg 37<br>  .   .   .                |
|          | Target ( <i>yfcP_b2333</i> ) | -7 aGGUGGGCAu -16                              |

---

|          |                              |                                                        |
|----------|------------------------------|--------------------------------------------------------|
| <b>7</b> | <b><i>fliE_b1937</i></b>     | <b>flagellar basal-body component</b>                  |
|          | Probability = 1              |                                                        |
|          | sRNA (sRNA1)                 | 18 cauucuaucac-ccgCCUGUGUCGc 42<br> .. .             . |
|          | Target ( <i>fliE_b1937</i> ) | 30 uuggggaaguuagg-GGACAUAGCGa 6                        |

---

|          |                              |                                                                   |
|----------|------------------------------|-------------------------------------------------------------------|
| <b>8</b> | <b><i>frsA_b0239</i></b>     | <b>hydrolase, binds to enzyme IIA(Glc)</b>                        |
|          | Probability = 1              |                                                                   |
|          | sRNA (sRNA1)                 | 30 cGCCUGUGUCg 40<br>                                             |
|          | Target ( <i>frsA_b0239</i> ) | 12 aCGGACACAGu 2                                                  |
|          | Probability = 1              |                                                                   |
|          | sRNA (sRNA1)                 | 102 aAGUGUUGA-----caggaa 116<br>  .   .                           |
|          | Target ( <i>frsA_b0239</i> ) | 69 aUCGCAGCUcceaaguccua 50                                        |
|          | Probability = 1              |                                                                   |
|          | sRNA (sRNA1)                 | 26 cACCCGCCUGu 36<br>                                             |
|          | Target ( <i>frsA_b0239</i> ) | -38 uUGGGCGGACu -48                                               |
|          | Probability = 1              |                                                                   |
|          | sRNA (sRNA1)                 | 102 aaguguuga-----caggaauaaUUGGGGCGc 128<br>  .   .           ... |
|          | Target ( <i>frsA_b0239</i> ) | 69 aucgcagcuccaaaguccuaca-AAUUUCGc 39                             |

---

---

9 *mntR\_b0817* DNA-binding transcriptional regulator of *mntH*  
 Probability = 1  
 sRNA (sRNA1) 32 cCUGUGUCGc 42  
 |||.|||.|  
 Target (*mntR\_b0817*) 46 uGACGCAGUGa 36  
 Probability = 1  
 sRNA (sRNA1) 66 cGCGCGGCGACg 77  
 |||||.||||  
 Target (*mntR\_b0817*) 15 aCGCGCUGCUGa 4

---

**10 *relE\_b1563* Qin prophage; toxin of the RelE-RelB toxin-antitoxin system**  
 Probability = 1  
 sRNA (sRNA1) 77 gGCCUGUUUGc 87  
 |||.|.|.|  
 Target (*relE\_b1563*) 33 aCGGGCGAGCa 23  
 Probability = 1  
 sRNA (sRNA1) 19 auucuaucacccgccugugucgcaaaagac-GGGAAUGCcgccag 63  
 |||.|. ||| |||| |.||||. | ||||  
 Target (*relE\_b1563*) 42 aaggaaauca--cgggcg-agcaguuuagguCUUUUAUG-cggu 1

---

11 *ymcE\_b0991* cold shock gene  
 Probability = 1  
 sRNA (sRNA1) 85 uCGCGCGCAUc 95  
 |||||  
 Target (*ymcE\_b0991*) 10 uCGCCGCGUAc -1  
 Probability = 1  
 sRNA (sRNA1) 6 aCGGCGGCG---ggucau 20  
 |.||||| |||||  
 Target (*ymcE\_b0991*) 12 gGUCGCCGGuaccaguc -6

---

12 *hybA\_b2996* hydrogenase 2 4Fe-4S ferredoxin-type component  
 Probability = 1  
 sRNA (sRNA1) 74 gacggcCUGUUUGCGGc 90  
 ||| ||||| |||  
 Target (*hybA\_b2996*) 13 augca-GACAAGUGCCa -3

---

13 *apaH\_b0049* diadenosine tetraphosphatase  
 Probability = 1  
 sRNA (sRNA1) 7 cggCGGCGGGUCA 19  
 ..|||||.|||  
 Target (*apaH\_b0049*) -24 cuuGCCGCUCAGc -36

Probability = 1  
 sRNA (sRNA1) 33 cUGUGUCGCCAa 44  
 |.|||||||  
 Target (apaH\_b0049) 12 cAUACAGCGGua 1  
 Probability = 1  
 sRNA (sRNA1) 36 uGUCGCCAA-aaga 48  
 ||||| |  
 Target (apaH\_b0049) 25 gCAGCGGUUauucc 12

---

14 *lamB\_b4036* maltose outer membrane porin (maltoporin)  
 Probability = 1  
 sRNA (sRNA1) 7 cGGCGGCGGGuca 19  
 |||||.||.  
 Target (*lamB\_b4036*) -141 aCCGCCGUCCggc -153  
 Probability = 1  
 sRNA (sRNA1) 15 ggUCAUUCUAUCacccgccugugucg 40  
 .||||||| | ||| |  
 Target (*lamB\_b4036*) 6 guAGUAAGAUAGa---ggacucagu -16

---

15 *srmB\_b2576* ATP-dependent RNA helicase  
 Probability = 1  
 sRNA (sRNA1) 120 uUGGGGCGCU 129  
 |||||  
 Target (*srmB\_b2576*) -14 cACCCGCGA -23

---

16 *dusC\_b2140* tRNA-dihydrouridine synthase C  
 Probability = 1  
 sRNA (sRNA1) 7 cgg-CGGCGGGUc 18  
 |||.||||.  
 Target (*dusC\_b2140*) -42 accaGUCGCCUaa -54  
 Probability = 0.997  
 sRNA (sRNA1) 22 cuAUCACCCGc 33  
 .|||||||  
 Target (*dusC\_b2140*) -2 agUAGUGGGCGu -13

---

---

17 *metC\_b3008*      cystathionine beta-lyase, PLP-dependent  
 Probability = 1  
 sRNA (sRNA1)            85 ugc-GGCGCAUCg 96  
                               || |||||  
 Target (metC\_b3008) -52 gcgcCCGCGUAGg -64  
 Probability = 1  
 sRNA (sRNA1)            28 cccgcCUGUGUCG----cca 43  
                               ||| |..|||        ||  
 Target (metC\_b3008)    8 aggc-GGUACAGCccuaagga -12

---

18 *lpxT\_b2174*      undecaprenyl pyrophosphate phosphatase  
 Probability = 1  
 sRNA (sRNA1)            8 gGCGGCGGGUcauucuaucac 28  
                               |||||...|        |||  
 Target (lpxT\_b2174) 20 aCGCCGUUUAAAAau-uagua 1  
 Probability = 1  
 sRNA (sRNA1)            74 gacggc-CUGUUUGCGGCg 91  
                               .|...| ||.|||||  
 Target (lpxT\_b2174) 32 uuguuguGAUAAACGCCGu 14

---

19 *hypC\_b2728*      protein required for maturation of hydrogenases 1 and 3  
 Probability = 1  
 sRNA (sRNA1)            48 aCGGAAUGCCg 59  
                               |||||.|||  
 Target (hypC\_b2728) 20 gGCCCUUGCGGa 9  
 Probability = 1  
 sRNA (sRNA1)            5 gACGGCGGGGUCAuucua 24  
                               |||||.|||||    ||  
 Target (hypC\_b2728) -130 aUGCCGUUGUCCAGUu-gaa -148

---

---

20 *idnK\_b4268* D-gluconate kinase, thermosensitive  
 Probability = 1  
 sRNA (sRNA1) 87 cGGCGCAUCGCa 98  
 |||.||||.|  
 Target (idnK\_b4268) -93 uCCGUGUAGUGc -104  
 Probability = 1  
 sRNA (sRNA1) 24 aUCACCCGCCu 34  
 |||||  
 Target (idnK\_b4268) 12 aAGUGGGCGGu 2  
 Probability = 0.995  
 sRNA (sRNA1) 66 cgCGCGGCGACg 77  
 .|||||.||  
 Target (idnK\_b4268) 77 uuGCGCCGUUGg 66

---

**21 *zitB\_b0752* zinc efflux system**  
 Probability = 1  
 sRNA (sRNA1) 10 cGGCGGGUCAUUCu 23  
 |.|||.||||.|.  
 Target (zitB\_b0752) 1 aUGCUCAGUAGGg -13

---

22 *yjeS\_b4166* predicted Fe-S electron transport protein  
 Probability = 1  
 sRNA (sRNA1) 3 uugacggcGGCGGGUCAUu 21  
 ||||. |.||| |||  
 Target (yjeS\_b4166) 7 gacugua-CUGCCUGGUAu -11

---

**23 *ydjJ\_b1774* predicted oxidoreductase, Zn-dependent and NAD(P)-binding**  
 Probability = 1  
 sRNA (sRNA1) 16 gucauucuaucacCCGCCUGUGUc 39  
 ||||| |||.|||.|||  
 Target (ydjJ\_b1774) 5 aaguaaaacuua-GGUGGGCAUaa -18

---

**24 *fliM\_b1945* flagellar motor switching and energizing component**  
 Probability = 1  
 sRNA (sRNA1) 29 cCGCCUGUGUCGc 41  
 ||||..|||||  
 Target (fliM\_b1945) 8 aGCGGGUACAGCa -5

---

---

25 *recE\_b1350* Rac prophage; exonuclease VIII, 5' -> 3' specific dsDNA exonuclease  
 Probability = 1  
 sRNA (sRNA1) 107 uGACAGGAuaauuggggc---gcua 130  
 |.||||||| ||| |||  
 Target (recE\_b1350) 28 cAUUGUCCUucuc-accaaacacgag 3

---

26 *hrpB\_b0148* predicted ATP-dependent helicase  
 Probability = 1  
 sRNA (sRNA1) 3 ugaCGGCGGCGGGucau 20  
 .| |.|||.||||.  
 Target (hrpB\_b0148) 26 ugccGUCGUUGCCCGuu- 10  
 Probability = 1  
 sRNA (sRNA1) 4 uGACGGCGGCG 14  
 |||||.||  
 Target (hrpB\_b0148) 28 uCUGCCGUCGu 18

Probability = 1  
 sRNA (sRNA1) 6 aCGGCGGCGg 15  
 |..||.||  
 Target (hrpB\_b0148) 13 cGUUGCUGCu 4  
 Probability = 1  
 sRNA (sRNA1) 4 ugACGGCGGC-----gggu---cauucua 24  
 .|||.||. | ||| |||||  
 Target (hrpB\_b0148) 12 guUGCUGCUGuguuuugcgaggucucccaauuguaagaa -27  
 Probability = 0.999  
 sRNA (sRNA1) 7 cGGCGGCGGg 16  
 |.||||.|  
 Target (hrpB\_b0148) 28 uCUGCCGUCg 19

---

**27 *yhdH\_b3253* predicted oxidoreductase, Zn-dependent and NAD(P)-binding**  
 Probability = 1  
 sRNA (sRNA1) 120 uGGGGCGCGuauau 134  
 ||..|||| ||||  
 Target (yhdH\_b3253) -76 uACUUCGCGuuuuu -90  
 Probability = 0.996  
 sRNA (sRNA1) 19 auucuaucacc--CGCCUGUGUc 39  
 ||||| |||||.||  
 Target (yhdH\_b3253) 22 caagauuuucauuGCGGACGUAu -1

---

---

28 *creB\_b4398* DNA-binding response regulator in two-component regulatory system with CreC  
Probability = 1  
sRNA (sRNA1) 71 ggcg-ACGGCCUGUu 84  
. ||| |||. |||||  
Target (creB\_b4398) -126 ucgcgUGCUGGACAU -140  
Probability = 1  
sRNA (sRNA1) 36 ugucgccaaaagacgggaaUGCCGCCA--gca 65  
. ||||| ||||| ||  
Target (creB\_b4398) -2 uuagcggagacaaua----ACGGCGGUgccgu -29

---

29 *yahD\_b0318* predicted transcriptional regulator with ankyrin domain  
Probability = 1  
sRNA (sRNA1) 9 gCGGCGGGU-----cauuc-uaucacccg 31  
||||. ||| |||||. || |||  
Target (yahD\_b0318) 26 aGCCGUCCAucuaaaaaauaugaguaaguguaagggga -12  
Probability = 1  
sRNA (sRNA1) 22 cUAUCACCCgccugugucgcaaa 45  
||||||| |||. |||||  
Target (yahD\_b0318) 56 uAUAGUGGGacaacacgucgguaa 33

---

30 **fepB\_b0592** **iron-enterobactin transporter subunit**  
Probability = 1  
sRNA (sRNA1) 4 uga-cggcGGCGGGUCA 19  
|| ||| ||||. |||  
Target (fepB\_b0592) 19 ucucgcc-CCGCUCAGa 4  
Probability = 1  
sRNA (sRNA1) 46 agacgggaaugccGCCAGCACg 67  
|| |||||. |||||  
Target (fepB\_b0592) -98 acucccuugu--CGGUCGUGa -117

---

31 *polB\_b0060* DNA polymerase II  
Probability = 1  
sRNA (sRNA1) 76 cggCCUGUUGCGgcgca 93  
.. ||||.. |||| |.|  
Target (polB\_b0060) 17 uuuGGACGGACGCggugc -1  
Probability = 1  
sRNA (sRNA1) 12 gcgggucauucuaucacccGCCUGUGUCGcc 42  
||||| || ||| |||||. |.|  
Target (polB\_b0060) 30 agcccauucuaauuuuggaCGGACGGGUGc -1

---

---

32 *yfcS\_b2336* predicted periplasmic pilus chaperone  
 Probability = 1  
 sRNA (sRNA1) 13 cGGGUCAUUCu---aucacc 29  
 ||.|||||. |||||  
 Target (*yfcS\_b2336*) 1 aCCUAGUAAGgaauuaguc -19  
 Probability = 1  
 sRNA (sRNA1) 105 uguug--ACAGGAAUAauuggggc 126  
 |.|| ||||.||. | ||||  
 Target (*yfcS\_b2336*) -29 ucgacuuUGUCUUUGUc--ccccu -50  
 Probability = 1  
 sRNA (sRNA1) 66 cGCGCGGCGacggccuguuugc-ggcg 91  
 |||||.|| |||| ||| |||  
 Target (*yfcS\_b2336*) -114 cGCGCUGCaa-cggaaauacgaccgu -139

---

33 *fhuE\_b1102* ferric-rhodotorulic acid outer membrane transporter  
 Probability = 1  
 sRNA (sRNA1) 100 aAAAGUGUgacaggaauaa-uuggg 124  
 |||||.|| |.||| |||||  
 Target (*fhuE\_b1102*) 8 cUUUCGUAAa---cuuagagaacca -15

---

34 *uhpC\_b3667* membrane protein regulates uhpT expression  
 Probability = 1  
 sRNA (sRNA1) 91 gcaucgcaaaaaaguguuGACAGGAAu 117  
 .|| ||| |||. |||||  
 Target (*uhpC\_b3667*) -41 ugu-gcgcacgg-cacguCUGUCCUu -65  
 Probability = 1  
 sRNA (sRNA1) 4 ugACGGCGGCgggucauucuauca 27  
 .|||||.|| .||||. |.  
 Target (*uhpC\_b3667*) 12 uuUGCCGUUG--uaguaguugga -10  
 Probability = 1  
 sRNA (sRNA1) 87 cGGCGCAUCG-caaaaaaguguugacaggaau 117  
 ||||| || |.|. | |||.||.  
 Target (*uhpC\_b3667*) 36 aCCGCGUAGCcguc---cgcgaagucuuug 9  
 Probability = 1  
 sRNA (sRNA1) 34 ugugucgcaaaa-AGACGGGAA-----ugccgcc-agca 65  
 |.|| ||| ||||.|||| | ||||.|| |||  
 Target (*uhpC\_b3667*) -44 gcgca-cggcacgUCUGUCCUUacacauuacacggugggucgc -86

---







---

50 *mscS\_b2924* mechanosensitive channel  
 Probability = 0.995  
 sRNA (sRNA1) 1 -UAUUGACGGCgg-cgggucauucuauc 26  
 |||.|||.|. |...|| |||.||  
 Target (*mscS\_b2924*) 26 gAUAGCUGUUGuaaguuuag-aagguaa -1

---

51 *mak\_b0394* manno(fructo)kinase  
 Probability = 0.99  
 sRNA (sRNA1) 34 uGUGUCGCCaaaagacgggaaugccgccagcacgcgcgacgg-ccug 82  
 |||.|||| ||| || ||.|| ||||.|||| || |||  
 Target (*mak\_b0394*) 30 cCACGGCGGauua-gc---uauggaua---ugcgugcca-ugagaggaa -12

---

52 *dapA\_b2478* dihydrodipicolinate synthase  
 Probability = 0.99  
 sRNA (sRNA1) 67 gCGCGGCGAcgg--ccuguuugc---ggcgcauc-----gcaaaaaaguguugaca-ggaauaaauugg---ggcgc 128  
 |||||.|.| ||.|| .| ||| |||| ||||| |||||. |||. |||| |||.|||  
 Target (*dapA\_b2478*) 25 aGCGCUGUUaugaagggcacuuguacccg-guaggagacacguuuguucacagaguuaccaugcaaaccuaccgua -51

---

**Table S4:** regions with homology to within the genome of *E. coli*

1- (2662273..2662285) non-coding region between *suhB* and *yfhR*

Score = 26.3 bits (13), Expect = 7.0  
 Identities = 13/13 (100%)  
 Strand = Plus / Minus

Query: 23           tatcacccgcctg 35  
                   |||||  
 Sbjct: 2662285   tatcacccgcctg 2662273

---

2- (2519454..2519466) non-coding region between *lysV* and *REPV173*

Score = 26.3 bits (13), Expect = 7.0  
 Identities = 13/13 (100%)  
 Strand = Plus / Plus

Query: 68           cgcggcgacggcc 80  
                   |||||  
 Sbjct: 2519454   cgcggcgacggcc 2519466

---

3- (780979..780991) non-coding region between *lysQ* and *nadA*

Score = 26.3 bits (13), Expect = 7.0  
 Identities = 13/13 (100%)  
 Strand = Plus / Plus

Query: 68           cgcggcgacggcc 80  
                   |||||  
 Sbjct: 780979   cgcggcgacggcc 780991

---

3- (3325770..3325781) non-coding region between *rlmE* and *yhbY*

Score = 24.3 bits (12), Expect = 28  
 Identities = 12/12 (100%)  
 Strand = Plus / Minus

Query: 13           cgggtcattcta 24  
                   |||||  
 Sbjct: 3325781   cgggtcattcta 3325770

---

5- (1877381..1877392) non-coding region between *yeaQ* and *yoaG*

Score = 24.3 bits (12), Expect = 28  
 Identities = 12/12 (100%)  
 Strand = Plus / Minus

Query: 92           catcgcaaaaaa 103  
                   |||||  
 Sbjct: 1877392   catcgcaaaaaa 1877381

---

6- (1500400..1500411) non-coding region between *tehB* and *ydcL*

Score = 24.3 bits (12), Expect = 28

Identities = 12/12 (100%)

Strand = Plus / Minus

Query: 98            aaaaaagtgttg 109  
                   | | | | | | | | | |  
 Sbjct: 1500411 aaaaaagtgttg 1500400

---

7- (1405859..1405870) non-coding region between *ydaM* and *ydaN*

Score = 24.3 bits (12), Expect = 28

Identities = 12/12 (100%)

Strand = Plus / Plus

Query: 93            atcgcaaaaaag 104  
                   | | | | | | | | | |  
 Sbjct: 1405859 atcgcaaaaaag 1405870

---

8- (1314409..1314420) non-coding region between *yciG* and *trpA*

Score = 24.3 bits (12), Expect = 28

Identities = 12/12 (100%)

Strand = Plus / Plus

Query: 53            aatgccgccagc 64  
                   | | | | | | | | | |  
 Sbjct: 1314409 aatgccgccagc 1314420

---

9- (741938..741949) non-coding region between *dtpD* and *ybgI*

Score = 24.3 bits (12), Expect = 28

Identities = 12/12 (100%)

Strand = Plus / Minus

Query: 39            cgccaaaagacg 50  
                   | | | | | | | | | |  
 Sbjct: 741949 cgccaaaagacg 741938

---

**Table S5:** Putative MtvR targets in the genome of *P. aeruginosa* UCBPP-PA14 predicted by TargetRNA

---

**1 PA14\_15920 major facilitator transporter**

Energy: -21.91 p-value: 0.000

sRNA 21 UUACUGGGCGGCGGC 7  
 |||| |

mRNA (PA14\_15920) -1 CAUGA-CCGCCGCCA 13

---

**2 PA14\_39850 MFS transporter**

Energy: -21.71 p-value: 0.000

sRNA 21 UAC---U-GGGCGGCGGCAGU 4  
 ||| |

mRNA (PA14\_39850) 1 AUGACCACCCCGCCGCCUC- 20

---

**3 katA catalase**

Energy: -21.03 p-value: 0.000

sRNA 24 AUCUUACUGGGCGGC 10  
 |||| |

mRNA (*katA*) 7 GAGAA-GACCCGCCU 20

---

**4 fepB iron-enterobactin transporter periplasmic binding protein**

Energy: -20.33 p-value: 0.000

sRNA 19 ACUGGGCGGCGGCA 6  
 |||||

mRNA (*fepB*) 5 CGACCCGCGCCGC 18

---

**5 PA14\_69340 ABC transporter ATP-binding protein**

Energy: -20.29 p-value: 0.000

sRNA 17 UGGGCGGCGGC 7  
 :|||

mRNA (PA14\_69340) -10 CUCCGCCGCCA 1

---

**6 PA14\_18050 hypothetical protein**

Energy: -20.18 p-value: 0.000

sRNA 17 UGGGCGGCGGCA 6  
 |||||

mRNA -20 CCCC GCCCGCA -9

(PA14\_18050)

**7 PA14\_69880** LysR family transcriptional regulator

Energy: -19.74 p-value: 0.000

|      |    |                  |   |
|------|----|------------------|---|
| sRNA | 22 | CUUACUGGGCGGCGGC | 7 |
|      |    | :                |   |

|                      |    |                  |    |
|----------------------|----|------------------|----|
| mRNA<br>(PA14_69880) | -2 | CAAUGACCCGUCGCCU | 14 |
|----------------------|----|------------------|----|

**8 modA** molybdate-binding periplasmic protein precursor modA

Energy: -18.98 p-value: 0.000

|      |    |                  |   |
|------|----|------------------|---|
| sRNA | 21 | UUACUGG-GCGGCGGC | 7 |
|      |    |                  |   |

|                      |    |                  |    |
|----------------------|----|------------------|----|
| mRNA ( <i>modA</i> ) | -1 | CAUGACCAC-CCGCCU | 14 |
|----------------------|----|------------------|----|

**9 ureD** urease accessory protein

Energy: -18.81 p-value: 0.000

|      |    |                   |   |
|------|----|-------------------|---|
| sRNA | 21 | UUACUGGGCGGCGGAGU | 4 |
|      |    | :                 |   |

|                      |    |                   |    |
|----------------------|----|-------------------|----|
| mRNA ( <i>ureD</i> ) | -2 | GAUGA-CCGCCGCCUCC | 16 |
|----------------------|----|-------------------|----|

**10 PA14\_56960** hypothetical protein

Energy: -18.31 p-value: 0.000

|      |    |                    |   |
|------|----|--------------------|---|
| sRNA | 20 | UACUGGG--CGGCGGAGU | 4 |
|      |    |                    |   |

|                      |   |                   |    |
|----------------------|---|-------------------|----|
| mRNA<br>(PA14_56960) | 1 | AUGACCCAGGCCCGUCC | 19 |
|----------------------|---|-------------------|----|

**11 gacA** response regulator GacA

Energy: -17.85 p-value: 0.000

|      |    |                       |    |
|------|----|-----------------------|----|
| sRNA | 71 | GC--G--CGCACGACCGCCGU | 55 |
|      |    | :  :        : :       |    |

|                      |   |                       |    |
|----------------------|---|-----------------------|----|
| mRNA ( <i>gacA</i> ) | 1 | UGAUUAAG-GUGCUGGUGGU- | 20 |
|----------------------|---|-----------------------|----|

**12 PA14\_53090** transcriptional regulator

Energy: -17.85 p-value: 0.000

|      |    |               |   |
|------|----|---------------|---|
| sRNA | 19 | ACUGGGCGGCGGC | 7 |
|      |    |               |   |

|                      |   |               |    |
|----------------------|---|---------------|----|
| mRNA<br>(PA14_53090) | 7 | CGACCCGCC-CCA | 18 |
|----------------------|---|---------------|----|

**13 PA14\_12610 transporter**

Energy: -17.78 p-value: 0.000

|      |     |             |     |
|------|-----|-------------|-----|
| sRNA | 130 | AUCGCGGGGUU | 120 |
|      |     |             |     |

|                      |    |            |   |
|----------------------|----|------------|---|
| mRNA<br>(PA14_12610) | -9 | AAGCGCCCAU | 2 |
|----------------------|----|------------|---|

**14 PA14\_28980 Fe<sup>2+</sup>-dicitrate sensor**

Energy: -17.7 p-value: 0.000

|      |    |                |   |
|------|----|----------------|---|
| sRNA | 21 | UACUGGGCGGCGGC | 7 |
|      |    | :              |   |

|                      |     |               |    |
|----------------------|-----|---------------|----|
| mRNA<br>(PA14_28980) | -20 | AUGACCCGCGCCU | -7 |
|----------------------|-----|---------------|----|

**15 fadH1 2,4-dienoyl-CoA reductase**

Energy: -17.64 p-value: 0.000

|      |    |                   |   |
|------|----|-------------------|---|
| sRNA | 20 | UACUGGGCGGCGGCAGU | 4 |
|      |    | :                 |   |

|                       |    |                  |    |
|-----------------------|----|------------------|----|
| mRNA ( <i>fadH1</i> ) | -1 | AUGA-CCGCCCGGUUC | 16 |
|-----------------------|----|------------------|----|

**16 PA14\_53920 transcriptional regulator**

Energy: -17.63 p-value: 0.000

|      |    |                    |   |
|------|----|--------------------|---|
| sRNA | 21 | UACUGGG-C---GGCGGC | 7 |
|      |    |                    |   |

|                      |   |                   |    |
|----------------------|---|-------------------|----|
| mRNA<br>(PA14_53920) | 1 | AUGACCCAGAACCCGCC | 18 |
|----------------------|---|-------------------|----|

**17 PA14\_18060 hypothetical protein**

Energy: -17.58 p-value: 0.000

|      |    |              |   |
|------|----|--------------|---|
| sRNA | 18 | CUGGGCGGCGGC | 7 |
|      |    | :     :      |   |

|                      |   |              |    |
|----------------------|---|--------------|----|
| mRNA<br>(PA14_18060) | 6 | CAUCCGCCGCUA | 17 |
|----------------------|---|--------------|----|

**18 aceK bifunctional isocitrate dehydrogenase kinase/phosphatase**

Energy: -17.53 p-value: 0.000

|      |     |             |     |
|------|-----|-------------|-----|
| sRNA | 130 | AUCGCGGGUUA | 119 |
|      |     | :           |     |

|                      |   |             |    |
|----------------------|---|-------------|----|
| mRNA ( <i>aceK</i> ) | 9 | GAGCGCCCAGC | 20 |
|----------------------|---|-------------|----|

**19 PA14\_15280** hypothetical protein

Energy: -16.95 p-value: 0.000

|      |    |                |   |
|------|----|----------------|---|
| sRNA | 21 | UUACUGGGCGGCGG | 8 |
|      |    |                |   |

|                      |    |                |    |
|----------------------|----|----------------|----|
| mRNA<br>(PA14_15280) | -1 | CAUGACCCACCGCA | 13 |
|----------------------|----|----------------|----|

---

**20 PA14\_20491** acetyltransferase

Energy: -16.87 p-value: 0.000

|      |    |                |    |
|------|----|----------------|----|
| sRNA | 83 | UGUCCGGCAGCGGC | 70 |
|      |    |                |    |

|                      |   |                |    |
|----------------------|---|----------------|----|
| mRNA<br>(PA14_20491) | 6 | CCAGACCGUCGCCA | 19 |
|----------------------|---|----------------|----|

---

**21 PA14\_50850** hypothetical protein

Energy: -16.5 p-value: 0.000

|      |    |                |    |
|------|----|----------------|----|
| sRNA | 23 | UCUUACUGGGCGGC | 10 |
|      |    |                |    |

|                      |    |                |    |
|----------------------|----|----------------|----|
| mRNA<br>(PA14_50850) | -3 | CGAAUGACCC-CCU | 10 |
|----------------------|----|----------------|----|

---

**22 PA14\_22280** pirin-related protein

Energy: -16.39 p-value: 0.000

|      |    |                 |   |
|------|----|-----------------|---|
| sRNA | 21 | UUACUGGGCGGCGCA | 6 |
|      |    | :               |   |

|                      |    |                  |    |
|----------------------|----|------------------|----|
| mRNA<br>(PA14_22280) | -1 | CAUGACCCGCUACCGU | 15 |
|----------------------|----|------------------|----|

---

**23 PA14\_44770** guanine deaminase

Energy: -16.34 p-value: 0.000

|      |    |                   |   |
|------|----|-------------------|---|
| sRNA | 21 | UUACUGGGCG--GCGGC | 7 |
|      |    |                   |   |

|                      |    |                   |    |
|----------------------|----|-------------------|----|
| mRNA<br>(PA14_44770) | -1 | CAUGACCCGCAACGCC- | 15 |
|----------------------|----|-------------------|----|

---

**24 PA14\_29090** periplasmic spermidine/putrescine-binding protein

Energy: -15.88 p-value: 0.000

|      |    |                     |   |
|------|----|---------------------|---|
| sRNA | 23 | UCUUACUGGGCG--GCGGC | 7 |
|      |    | :                   |   |

|                      |   |                     |    |
|----------------------|---|---------------------|----|
| mRNA<br>(PA14_29090) | 2 | UGAA-GACCCGCAUCGCUU | 19 |
|----------------------|---|---------------------|----|

**25** PA14\_40280 hypothetical protein

Energy: -15.57 p-value: 0.000

|                      |    |                      |    |
|----------------------|----|----------------------|----|
| sRNA                 | 23 | UCUU--ACUGGGCGGCGGCA | 6  |
|                      |    | :                    |    |
| mRNA<br>(PA14_40280) | 2  | UGAGCCUUUCCC-CCGCCGA | 20 |

**26** PA14\_31070 hypothetical protein

Energy: -15.57 p-value: 0.000

|                      |    |                       |    |
|----------------------|----|-----------------------|----|
| sRNA                 | 77 | GCAGCGGCGCGCACGACCGCC | 57 |
|                      |    | :    :         :      |    |
| mRNA<br>(PA14_31070) | 2  | UGUCGUCGCGGUGC-AGU-G  | 20 |

**27** fepC ferric enterobactin transport protein FepC

Energy: -15.5 p-value: 0.000

|                      |    |                 |    |
|----------------------|----|-----------------|----|
| sRNA                 | 21 | UUACUGGGCGGCGGC | 7  |
|                      |    | :               |    |
| mRNA ( <u>fepC</u> ) | -1 | CAUGACCCAUCGCCU | 14 |

**28** PA14\_38950 hypothetical protein

Energy: -15.49 p-value: 0.000

|                      |    |                 |    |
|----------------------|----|-----------------|----|
| sRNA                 | 18 | CUGGGC-GGCGGCAG | 5  |
|                      |    | :               |    |
| mRNA<br>(PA14_38950) | 2  | UGCCCACC GCCGUA | 16 |

**29** pykA pyruvate kinase

Energy: -15.45 p-value: 0.000

|             |    |                 |    |
|-------------|----|-----------------|----|
| sRNA        | 81 | UCCGGC-AGCGGCGC | 68 |
|             |    |                 |    |
| mRNA (pykA) | 2  | UGUCCGUUCGCCGCA | 16 |

**30** phaD poly(3-hydroxyalkanoic acid) depolymerase

Energy: -15.26 p-value: 0.001

|             |     |           |     |
|-------------|-----|-----------|-----|
| sRNA        | 15  | GCGGCGGCA | 6   |
|             |     |           |     |
| mRNA (phaD) | -20 | CGCCGCCGA | -12 |

**31 PA14\_29760** chemotaxis transducer

Energy: -15.25 p-value: 0.001

|                      |    |                  |    |
|----------------------|----|------------------|----|
| sRNA                 | 17 | UGGGCGGGCGG-CAGU | 4  |
|                      |    | :                |    |
| mRNA<br>(PA14_29760) | 7  | CUUCGCCGCCUGUC-  | 20 |

---

**32 PA14\_26350** hypothetical protein

Energy: -15.08 p-value: 0.001

|                      |     |            |     |
|----------------------|-----|------------|-----|
| sRNA                 | 75  | AGCGGCGCGC | 66  |
|                      |     |            |     |
| mRNA<br>(PA14_26350) | -20 | ACGCCGCGCA | -11 |

---

**33 algF** alginate o-acetyltransferase AlgF

Energy: -15.01 p-value: 0.001

|                      |    |                |    |
|----------------------|----|----------------|----|
| sRNA                 | 22 | CUUACUGGGCGGCG | 9  |
|                      |    | :              |    |
| mRNA ( <i>algF</i> ) | 8  | CGAUGACCCGCCG- | 20 |

---

**34 PA14\_15190** hypothetical protein

Energy: -15 p-value: 0.001

|                      |    |                  |    |
|----------------------|----|------------------|----|
| sRNA                 | 17 | UGGGCGGGCGGCAGUU | 3  |
|                      |    | :                |    |
| mRNA<br>(PA14_15190) | -4 | UCCC-AUGCCGUCAU  | 10 |

---

**35 PA14\_43650** hypothetical protein

Energy: -14.84 p-value: 0.001

|                      |    |                 |    |
|----------------------|----|-----------------|----|
| sRNA                 | 76 | CAGCGGCGCGCACGA | 62 |
|                      |    | :               |    |
| mRNA<br>(PA14_43650) | 7  | AUCGCUUCGCGUGC- | 20 |

---

**36 PA14\_17990** hypothetical protein

Energy: -14.83 p-value: 0.001

|      |    |                 |   |
|------|----|-----------------|---|
| sRNA | 21 | UUACUGGGCGGCGGC | 7 |
|      |    | :               |   |

|                      |    |                 |    |
|----------------------|----|-----------------|----|
| mRNA<br>(PA14_17990) | -1 | CAUGACCC-CUGCCA | 13 |
|----------------------|----|-----------------|----|

---

**37 PA14\_53210** hypothetical protein

Energy: -14.56 p-value: 0.001

|      |    |                |   |
|------|----|----------------|---|
| sRNA | 19 | ACUGGGCGGCGGCA | 6 |
|      |    |                |   |

|                      |   |               |    |
|----------------------|---|---------------|----|
| mRNA<br>(PA14_53210) | 7 | GGAACCGCCCGCA | 20 |
|----------------------|---|---------------|----|

---

**38 PA14\_03490** hypothetical protein

Energy: -14.47 p-value: 0.001

|      |    |                      |   |
|------|----|----------------------|---|
| sRNA | 21 | UUACUGG-GCGGCGGCAG-U | 4 |
|      |    |                      |   |

|                      |    |                      |    |
|----------------------|----|----------------------|----|
| mRNA<br>(PA14_03490) | -1 | CAUGACCAC-CCGCC-UCGA | 17 |
|----------------------|----|----------------------|----|

---

**39 PA14\_46360** two-component response regulator

Energy: -14.41 p-value: 0.001

|      |    |                  |   |
|------|----|------------------|---|
| sRNA | 24 | AUCUUACUGGGCGGCG | 9 |
|      |    | :                |   |

|                      |    |                  |    |
|----------------------|----|------------------|----|
| mRNA<br>(PA14_46360) | -4 | AAGAAUGACUGGCCG- | 11 |
|----------------------|----|------------------|----|

---

**40 PA14\_15720** transglycosylase

Energy: -14.25 p-value: 0.001

|      |    |                  |    |
|------|----|------------------|----|
| sRNA | 71 | GCGCGCACGACCGCCG | 56 |
|      |    |                  |    |

|                      |    |                  |    |
|----------------------|----|------------------|----|
| mRNA<br>(PA14_15720) | -5 | AGCGCGUGCAGAAGG- | 10 |
|----------------------|----|------------------|----|

---

**41 pilF** type 4 fimbrial biogenesis protein PilF

Energy: -14.24 p-value: 0.001

|      |    |               |    |
|------|----|---------------|----|
| sRNA | 78 | GGCAGCGGCGCGC | 66 |
|      |    |               |    |

|                      |   |               |    |
|----------------------|---|---------------|----|
| mRNA ( <i>pilF</i> ) | 9 | ACG-CGCCGCGCU | 20 |
|----------------------|---|---------------|----|

---

**42** recO DNA repair protein RecO

Energy: -14.18 p-value: 0.001

|                      |    |                  |   |
|----------------------|----|------------------|---|
| sRNA                 | 19 | ACUGGGCGGCGGCAGU | 4 |
|                      |    | :                |   |
| mRNA ( <i>recO</i> ) | -9 | CGACCCGCC-AUGUCC | 6 |

---

**43** PA14\_20880 hypothetical protein

Energy: -14.12 p-value: 0.002

|                      |     |                    |   |
|----------------------|-----|--------------------|---|
| sRNA                 | 17  | UGGG---CGGCGGCAGUU | 3 |
|                      |     |                    |   |
| mRNA<br>(PA14_20880) | -16 | CCCCUGAGCCCGCACAU  | 2 |

---

**44** PA14\_26260 hydrolase

Energy: -14.03 p-value: 0.002

|                      |    |                     |    |
|----------------------|----|---------------------|----|
| sRNA                 | 27 | ACUAUCUUACUGG-GCGGC | 10 |
|                      |    |                     |    |
| mRNA<br>(PA14_26260) | -6 | AGA-AGAAUGACCGAGCCU | 12 |

---

**45** nosF NosF protein

Energy: -13.92 p-value: 0.002

|                      |     |             |     |
|----------------------|-----|-------------|-----|
| sRNA                 | 17  | GGGCGGCGGCA | 6   |
|                      |     |             |     |
| mRNA ( <i>nosF</i> ) | -20 | CCCGCCGCGGA | -10 |

---

**46** PA14\_11650 hypothetical protein

Energy: -13.81 p-value: 0.002

|                      |     |                  |    |
|----------------------|-----|------------------|----|
| sRNA                 | 17  | GGGCGGCGGCAGUUA- | 2  |
|                      |     | :                |    |
| mRNA<br>(PA14_11650) | -20 | CCCGCCGCC--CAGUG | -7 |

---

**47** PA14\_12670 hypothetical protein

Energy: -13.74 p-value: 0.002

|                      |    |                     |    |
|----------------------|----|---------------------|----|
| sRNA                 | 66 | CACG-ACCGCCGUAAGGGC | 49 |
|                      |    | :                   |    |
| mRNA<br>(PA14_12670) | 1  | AUGCGGCGGCAAGCUCU   | 19 |

---

**48 PA14\_49720** hypothetical protein

Energy: -13.64 p-value: 0.002

|      |    |                   |   |
|------|----|-------------------|---|
| sRNA | 20 | UACUG-GGCGGCGGCAG | 5 |
|      |    | :                 |   |

|                      |   |                  |    |
|----------------------|---|------------------|----|
| mRNA<br>(PA14_49720) | 1 | AUGUCACUGCCGCGUA | 17 |
|----------------------|---|------------------|----|

---

**49 PA14\_68920** LysR family transcriptional regulator

Energy: -13.57 p-value: 0.002

|      |    |                 |   |
|------|----|-----------------|---|
| sRNA | 19 | ACUGG--GCGGCGGC | 7 |
|      |    |                 |   |

|                      |   |                 |    |
|----------------------|---|-----------------|----|
| mRNA<br>(PA14_68920) | 6 | CGACCUACGCCGCCU | 20 |
|----------------------|---|-----------------|----|

---

**50 PA14\_40650** hypothetical protein

Energy: -13.31 p-value: 0.003

|      |    |                 |   |
|------|----|-----------------|---|
| sRNA | 23 | UCUUAC-UGGGCGGC | 7 |
|      |    | :               |   |

|                      |     |                    |   |
|----------------------|-----|--------------------|---|
| mRNA<br>(PA14_40650) | -15 | CGGA-GAACCCGCC-CCA | 1 |
|----------------------|-----|--------------------|---|

---

**51 PA14\_46310** hypothetical protein

Energy: -13.25 p-value: 0.003

|      |    |                     |   |
|------|----|---------------------|---|
| sRNA | 23 | UCUUACUGGGCGGC-GGCA | 6 |
|      |    | :                   |   |

|                      |    |                     |    |
|----------------------|----|---------------------|----|
| mRNA<br>(PA14_46310) | -3 | CGCAUGACCCG-UGACCG- | 14 |
|----------------------|----|---------------------|----|

---

**52 PA14\_42920** hypothetical protein

Energy: -13.18 p-value: 0.003

|      |    |                 |    |
|------|----|-----------------|----|
| sRNA | 39 | CUGUGUCCGCCACUA | 24 |
|      |    | :               |    |

|                      |     |                  |    |
|----------------------|-----|------------------|----|
| mRNA<br>(PA14_42920) | -20 | GGCA-AGGCGGGUGAC | -6 |
|----------------------|-----|------------------|----|

---

**53 PA14\_29210** MFS transporter

Energy: -13.17 p-value: 0.003

|      |    |             |   |
|------|----|-------------|---|
| sRNA | 19 | AC-UGGGCGGC | 7 |
|      |    |             |   |

|                      |   |                |    |
|----------------------|---|----------------|----|
| mRNA<br>(PA14_29210) | 6 | CGCACCCGCCGCCU | 19 |
|----------------------|---|----------------|----|

---

**54 PA14\_37910** LysR family transcriptional regulator

Energy: -13.14 p-value: 0.003

|      |    |                     |   |
|------|----|---------------------|---|
| sRNA | 19 | ACUGGGC-GGCGGCAGUUA | 2 |
|      |    | :  :                |   |

|                      |   |                     |    |
|----------------------|---|---------------------|----|
| mRNA<br>(PA14_37910) | 3 | GGACCUGAAUGCCGUCAA- | 20 |
|----------------------|---|---------------------|----|

**55 PA14\_58440** ABC transporter permease

Energy: -13.12 p-value: 0.003

|      |    |                |    |
|------|----|----------------|----|
| sRNA | 24 | AUCUACUGGGCGGC | 10 |
|      |    | :  :           |    |

|                      |     |                 |    |
|----------------------|-----|-----------------|----|
| mRNA<br>(PA14_58440) | -17 | AGGAGUUACCCGCCA | -3 |
|----------------------|-----|-----------------|----|

**56 PA14\_16740** hypothetical protein

Energy: -13.11 p-value: 0.003

|      |    |                |   |
|------|----|----------------|---|
| sRNA | 19 | ACU-GGGCGGCGGC | 7 |
|      |    |                |   |

|                      |     |                |   |
|----------------------|-----|----------------|---|
| mRNA<br>(PA14_16740) | -13 | GGAGCCCGCCGCCA | 1 |
|----------------------|-----|----------------|---|

**57 PA14\_05040** coproporphyrinogen III oxidase

Energy: -13.1 p-value: 0.003

|      |    |                   |   |
|------|----|-------------------|---|
| sRNA | 17 | UGGGC--GGCGGCAGUU | 3 |
|      |    |                   |   |

|                      |     |                  |   |
|----------------------|-----|------------------|---|
| mRNA<br>(PA14_05040) | -12 | CCCCGCCCGCCGUGAC | 5 |
|----------------------|-----|------------------|---|

**58 PA14\_71100** hypothetical protein

Energy: -13.09 p-value: 0.003

|      |    |                   |   |
|------|----|-------------------|---|
| sRNA | 18 | CUGGGCGGCGGCAGUUA | 2 |
|      |    |                   |   |

|                      |   |                   |    |
|----------------------|---|-------------------|----|
| mRNA<br>(PA14_71100) | 6 | CACCCUCC-CCGUCAA- | 20 |
|----------------------|---|-------------------|----|

**59 napF** ferredoxin protein NapF

Energy: -13.02 p-value: 0.004

|      |    |                   |    |
|------|----|-------------------|----|
| sRNA | 80 | CCGGCAGCGG--CGCGC | 66 |
|      |    |                   |    |

|                      |   |                   |    |
|----------------------|---|-------------------|----|
| mRNA ( <i>napF</i> ) | 4 | AGCAGUCGCCGAGAGCU | 20 |
|----------------------|---|-------------------|----|

**60 PA14\_06460** hypothetical protein

Energy: -12.99 p-value: 0.004

sRNA 75 GCGGCGCGC 66

|||||

mRNA (PA14\_06460) -20 CGCCGCGCA -12

**61 adhA** alcohol dehydrogenase

Energy: -12.97 p-value: 0.004

sRNA 27 CUAUCU--UACUGGG-CGGCGG 8

||| || ||||| ||| |

mRNA (*adhA*) -7 GAU-GACCAUGACCCUGCCACA 14**62 PA14\_61990** hypothetical protein

Energy: -12.84 p-value: 0.004

sRNA 19 ACUGGGCGGCGCA 6

|||||: ||

mRNA (PA14\_61990) 8 AGACCCGCU-ACGG 20

**63 PA14\_60550** ATP-dependent protease

Energy: -12.77 p-value: 0.004

sRNA 79 CGGCAGCGGCGC 68

|||||: ||

mRNA (PA14\_60550) 10 UCCGUCGUCG- 20

**64 PA14\_58110** Maf-like protein

Energy: -12.65 p-value: 0.005

sRNA 83 UGUCCGGCAGCGGCGC 68

|| |||||: |:

mRNA (PA14\_58110) -2 CCAUGCCGUCGUGUA 14

**Table S6:** Putative MtvR targets in the genome of *P. aeruginosa* UCBPP-PA14 predicted by RNAPredator

| Energy [kJ/mol] | z-Score | Interaction                                                                                                                                                   | mRNA [Start] | mRNA [End] | sRNA    | Gene Annotation                               |
|-----------------|---------|---------------------------------------------------------------------------------------------------------------------------------------------------------------|--------------|------------|---------|-----------------------------------------------|
| -16.06          | -2.49   | ((((.(((((((..(((((((&)))))))))))))).)))<br>mRNA: 5'- GAUCGCAUGACCCAGGCCGCCG -3'<br>                   <br>sRNA: 3'- CUAUCUUACUGGG--CGGCGGC -5'               | -6           | 17         | 5-26    | hypothetical protein 56960                    |
| -16.04          | -2.48   | (((((...(((((((&)))))))))).))))<br>mRNA: 5'- GAUGGACUGGACCCGCCGC -3'<br>             <br>sRNA: 3'- CUAUCUUA-CUGGGCGGCG -5'                                    | -1           | 18         | 8-26    | transcriptional regulator                     |
| -15.91          | -2.43   | (((((...((((((((&)))))))))).))..))))<br>mRNA: 5'- GCGGGUGCCGGCAUGACCCAGCCGC -3'<br>                   <br>sRNA: 3'- CGCCACUAUCUUACUGGG-CGGCG -5'              | -12          | 13         | 8-32    | hypothetical protein 34940                    |
| -15.49          | -2.28   | (((((....(((((((..(((((((&)))))))))).)).....))))<br>mRNA: 5'- GUAGCCCAUGC-----CCCA-UCCCAU -3'<br>               <br>sRNA: 3'- UAUCG----CGGGGUUAA-UAAGGACA -5' | -6           | 20         | 104-131 | putative hydrolase                            |
| -15.39          | -2.24   | (((((.((((((((&)))))))))).)))<br>mRNA: 5'- CGUG-GCAUGAGCGGCAUUC -3'<br>               <br>sRNA: 3'- GCGCAC-GA-CCGCCGUAAGG -5'                                 | -5           | 16         | 49-69   | phenazine biosynthesis protein<br><b>PhzD</b> |

| Energy [kJ/mol] | z-Score | Interaction                                                                                                | mRNA [Start] | mRNA [End] | sRNA    | Gene Annotation                                                  |
|-----------------|---------|------------------------------------------------------------------------------------------------------------|--------------|------------|---------|------------------------------------------------------------------|
| -14.54          | -1.94   | (((((((((....((&)).....))))))))))                                                                          | -7           | 8          | 113-129 | putative transporter                                             |
|                 |         | mRNA: 5' - AGCGCCCAUGAG-UC -3'<br>                 <br>sRNA: 3' - UCGCGGGGUAAUAAG -5'                      |              |            |         |                                                                  |
| -14.39          | -1.88   | ((((((((((((&))))))....))))))                                                                              | -13          | -2         | 109-125 | hypothetical protein 70860                                       |
|                 |         | mRNA: 5' - CCCCA-----UC -3'<br>                 <br>sRNA: 3' - GGGGUAAUAAG -5'                             |              |            |         |                                                                  |
| -14.27          | -1.84   | (((((((((.(((((((&))))))..)))))).))))))                                                                    | -3           | 19         | 8-30    | endonuclease III                                                 |
|                 |         | mRNA: 5' - GGAGUGA-UUGAAU-GAAUGCCG -3'<br>                      <br>sRNA: 3' - CC-CACUA-UCUUACUGGGCGGC -5' |              |            |         |                                                                  |
| -14.22          | -1.82   | (((((((((((((&))))))))))))))                                                                               | 6            | 20         | 5-18    | <b>iron enterobactin transporter periplasmic binding protein</b> |
|                 |         | mRNA: 5' - GACCCGCCGCGCGCU -3'<br>                  <br>sRNA: 3' - CUGGGCGGCGGC-A -5'                      |              |            |         |                                                                  |



### Supplementary References

1. Markowitz VM, Chen IMA, Palaniappan K, Chu K, Szeto E, et al. (2010) The integrated microbial genomes system: an expanding comparative analysis resource. *Nucleic Acids Res* 30: D382-D390.
2. Zhao Y, Li H, Hou Y, Cha L, Cao Y, et al. (2008) Construction of two mathematical models for prediction of bacterial sRNA targets. *Biochem Biophys Res Commun* 372: 346-350.
3. Tjaden B, Goodwin SS, Opdyke JA, Guillier M, Fu DX, et al. (2006) Target prediction for small, noncoding RNAs in bacteria. *Nucleic Acids Res* 34: 2791-2802.
4. Eggenhofer F, Tafer H, Stadler PF, Hofacker IL (2011) RNApredator: fast accessibility-based prediction of sRNA targets. *Nucleic Acids Res* 39: W149-W154.
